# Supplementary material for: Induction of hypoxia and necrosis in multicellular tumor spheroids is associated with resistance to chemotherapy treatment
Source: PubMed Central journal article supplement (PMC5352092; doi:10.18632/oncotarget.13857), 2016-12-10
Supplement: oncotarget-08-1725-s001.pdf [file oncotarget-08-1725-s001.pdf]

# Induction of hypoxia and necrosis in multicellular tumor spheroids is associated with resistance to chemotherapy treatment

## SUPPLEMENTARY FIGURES

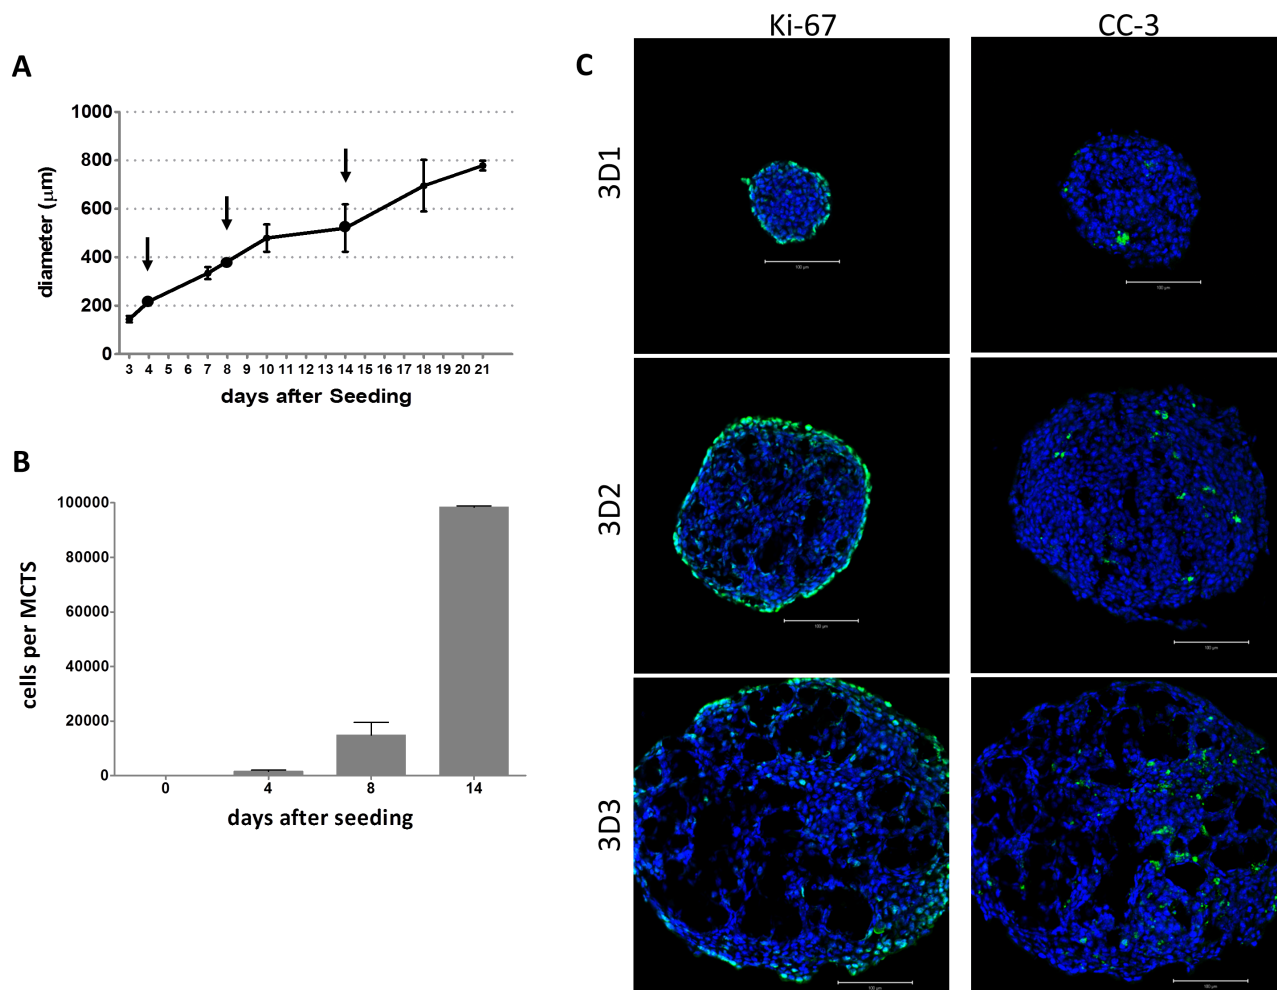

**Supplementary Figure S1: Establishment of HCT116 CRC cell MCTS at different stages.** HCT116 cells were seeded at 100 cells per hanging drop and cultured up to 21 days. MCTS sizes were measured **A**, and cell numbers were counted **B**, at specific time points, as indicated. Ki-67 and CC3 specific staining was performed on sections derived from MCTS at different stages **C**. Magnification 20x; scale bar 100µm.

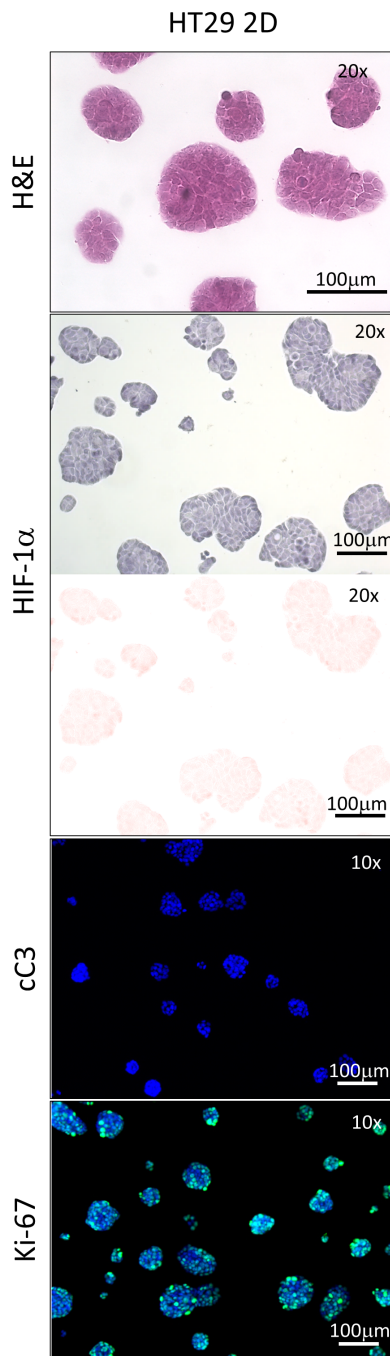

**Supplementary Figure S2: Histological characterization of HT29 cells cultured in 2D.** HT29 cells cultured in 2D were stained for H&E or with anti-HIF1 $\alpha$  (upper panel HIF-1 $\alpha$  and counterstaining with Hematoxylin, lower panel color deconvolution to show the HIF-1 $\alpha$  positivity only), anti-cleaved Caspase 3 (cC3, green) or anti-Ki-67 antibodies (green). In the cC3 and Ki-67 stainings the nuclei were counterstained with DAPI (blue). Magnification 10x and 20x as indicated in the images. Scale bar 100µm as indicated.

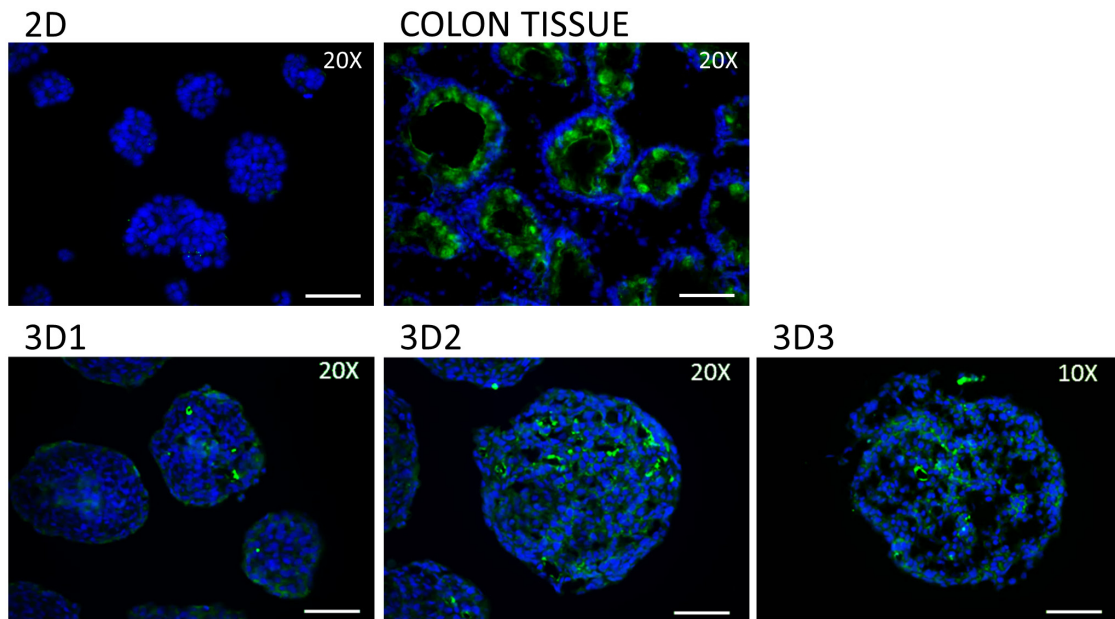

**Supplementary Figure S3: EBP50 specific staining of HT29 CRC cells in different culture conditions.** Cells from healthy colon tissue, HT29 monolayers and HT29 MCTS at different stages were stained with an anti-EBP50 specific antibody. Magnifications 10x and 20x as indicated in the images; scale bar 50 $\mu$ m (3D3 image) and 100 $\mu$ m.

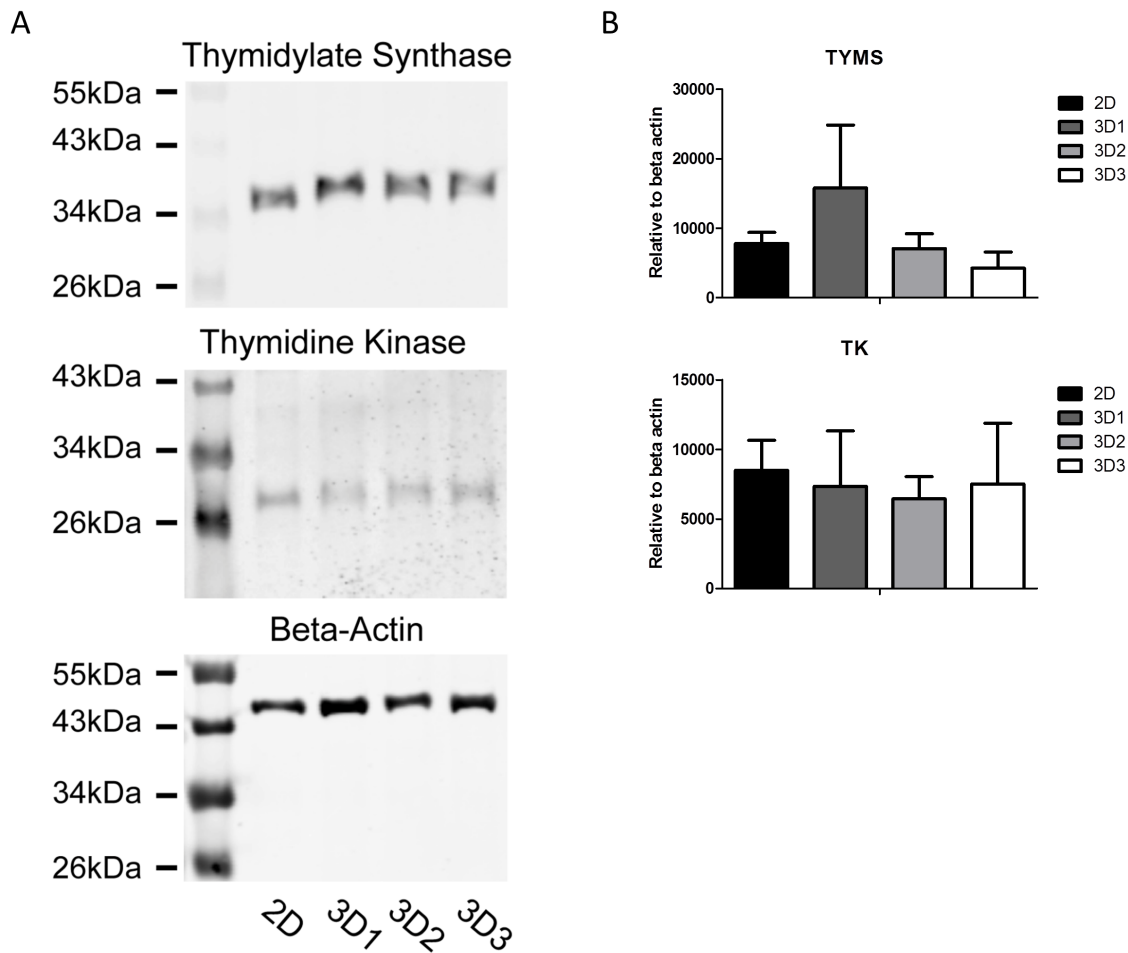

**Supplementary Figure S4: Expression of Thymidylate Synthase and Thymidine Kinase in HT29 cells.** HT29 cells were cultured in monolayers or MCTS of different sizes. Thymidylate synthase (TYMS) and Thymidine kinase (TK) protein expressions were assessed by Western blot analysis using whole-cell lysates panel A. Quantifications of TYMS and TK protein amounts relative to Beta-actin are showed as mean and SD from three independent experiments panel B.

**Supplementary File S1:**

See Supplementary File 1
